# Supplementary material for: Reversible On-Off Photoswitching of DNA Replication Using a Dumbbell Oligodeoxynucleotide
Source: MDPI journal article supplement (doi:10.3390/molecules27248992), 2022-12-16

# Supporting Information

## Reversible on-off Photoswitching of DNA Replication Using a Dumbbell Oligodeoxynucleotide

Yu Wang <sup>1,†</sup>, Heming Ji <sup>1,2,†</sup>, Jian Ma <sup>1,†</sup>, Hang Luo <sup>1</sup>, Yujian He <sup>1</sup>, Xinjing Tang <sup>3,\*</sup> and Li Wu <sup>1,2,\*</sup>

<sup>1</sup> School of Chemical Sciences, University of Chinese Academy of Sciences, Beijing 100049, China

<sup>2</sup> Zhejiang Institute of Mechanical and Electrical Technician, Yiwu 322000, China

<sup>3</sup> State Key Laboratory of Natural and Biomimetic Drugs, School of Pharmaceutical Sciences, Peking University, Beijing 100191, China

\* Correspondence: xinjingt@bjmu.edu.cn (X.T.); wuli@ucas.ac.cn (L.W.)

† These authors contributed equally to this work.

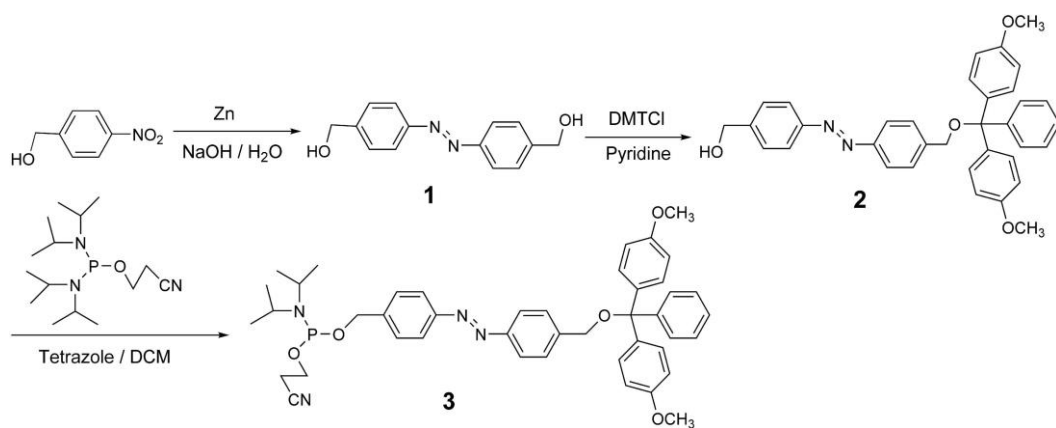

**Figure S1.** Synthetic procedure of azobenzene phosphoramidite.

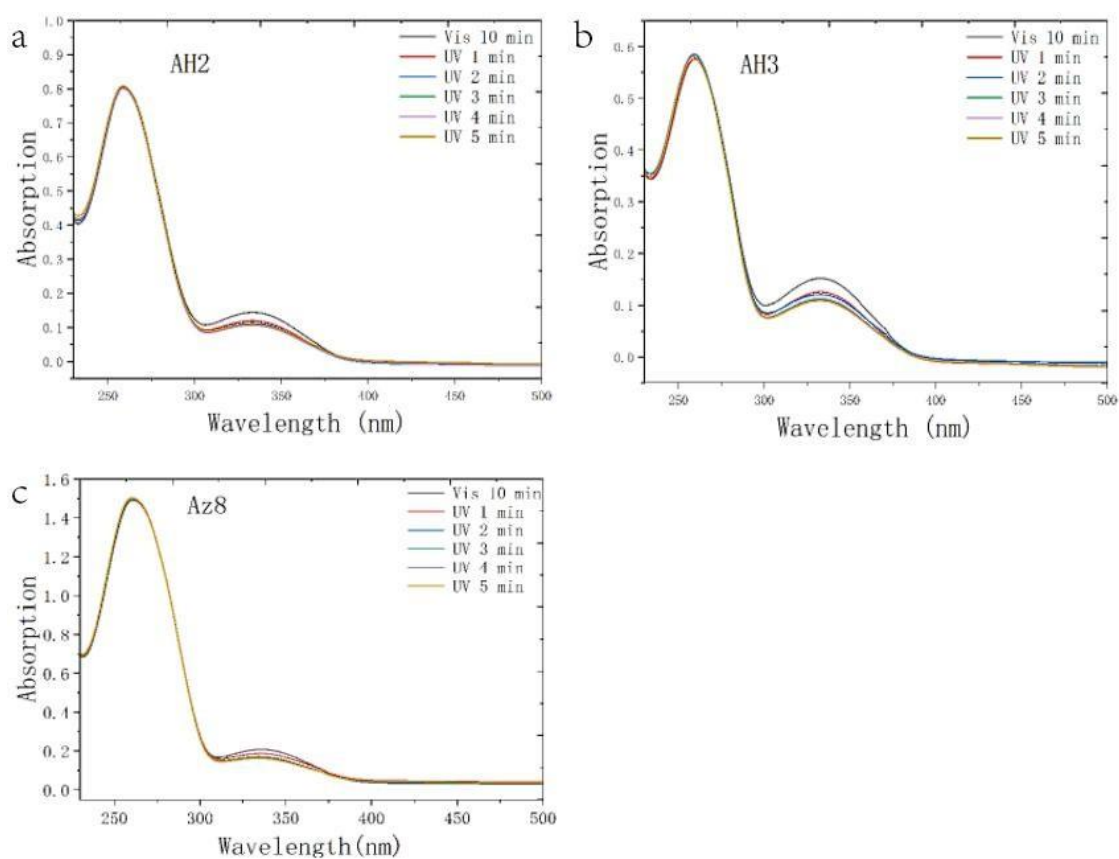

**Figure S2.** Photoisomerization of asODNs and azODNs. After a wavelength illumination time of 365 nm for 1 min, 2 min, 3 min, 4 min and 5 min, the characteristic absorption peak at asODNs and azODNs 350nm decreased. **a** AAAAGazoCTTTT; **b** AATAGazoCTATT; **c** 5'-GTTGGazoCCAACGTTTCGGACCGTATTazoAATAC-3'.

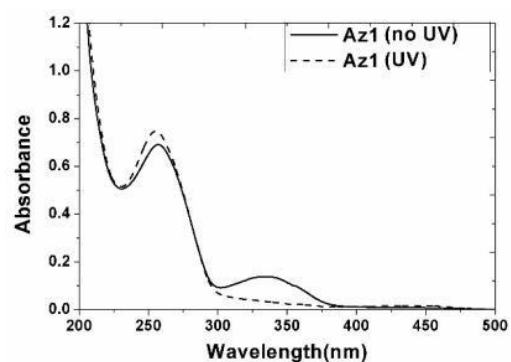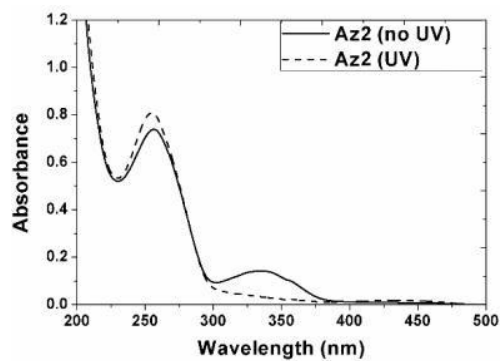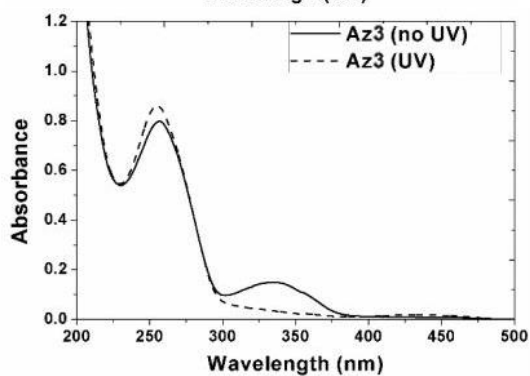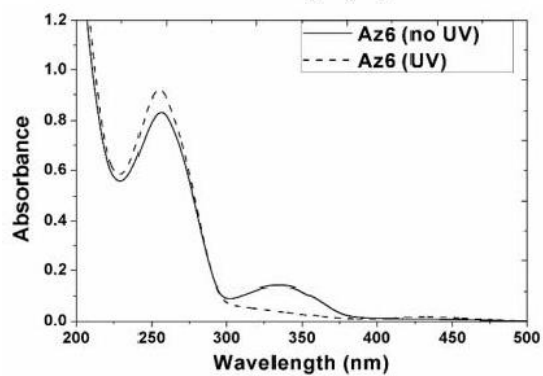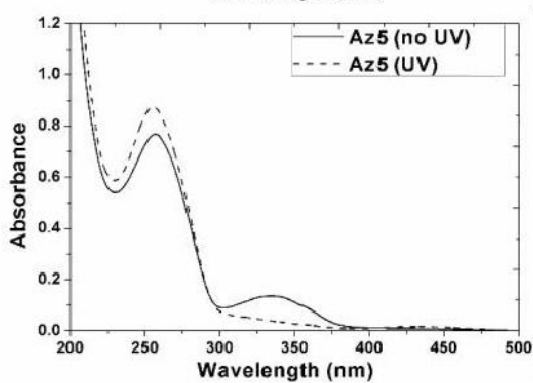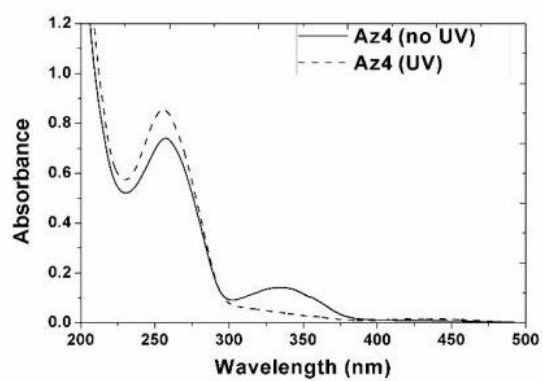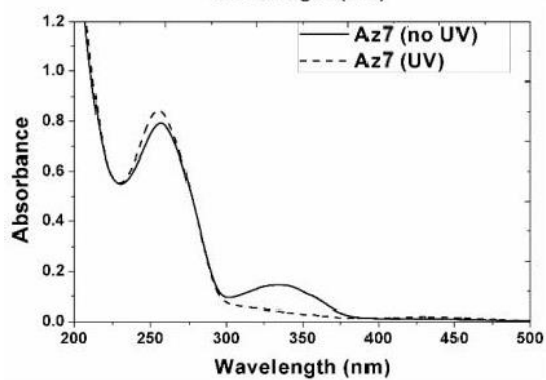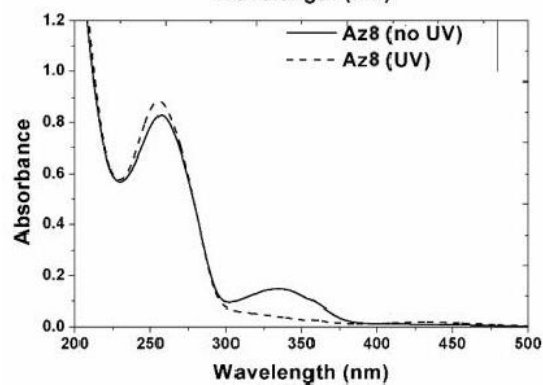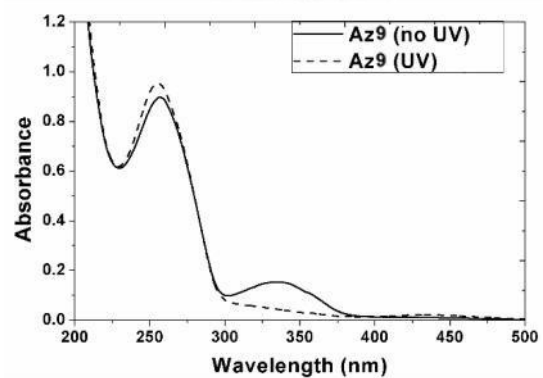

**Figure S3.** UV/vis absorbance spectra of the respective isomeric forms of all azobenzene linked dumbbell ODNs before and after light illumination for 30 min. The samples (2  $\mu\text{M}$ ) were irradiated with UV (365 nm, trans-to-cis) in 1 $\times$  PBS until absorbance changes were no longer observable.

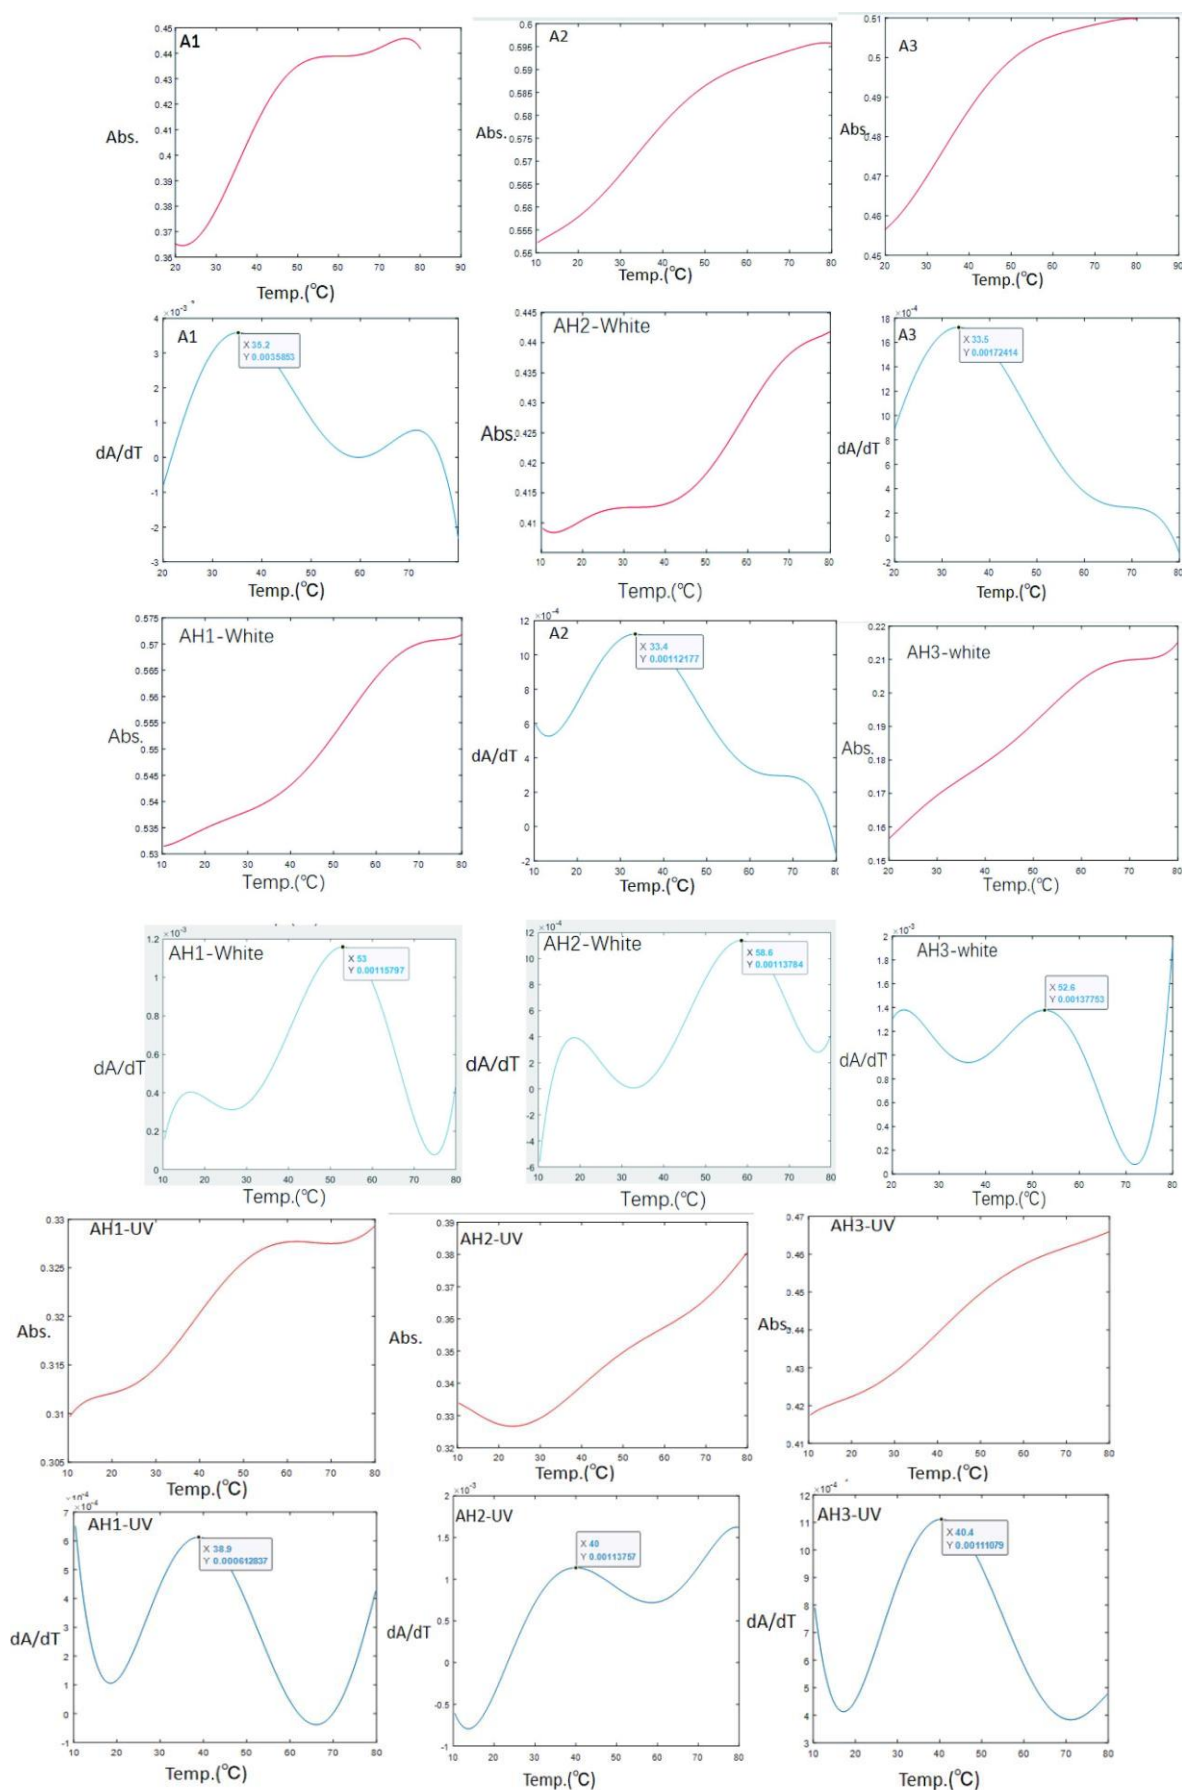

**Figure S4** Measure the hairpin azODNs dissolution curve with a variable temperature UV spectrophotometer. AH1, AH2 and AH3 solutions were obtained by detecting the absorption value of 260 nm after 30 minutes of UV or white light illumination, respectively. The matrix software uses the derivative of the discrete function difference to the a-discrete test value.

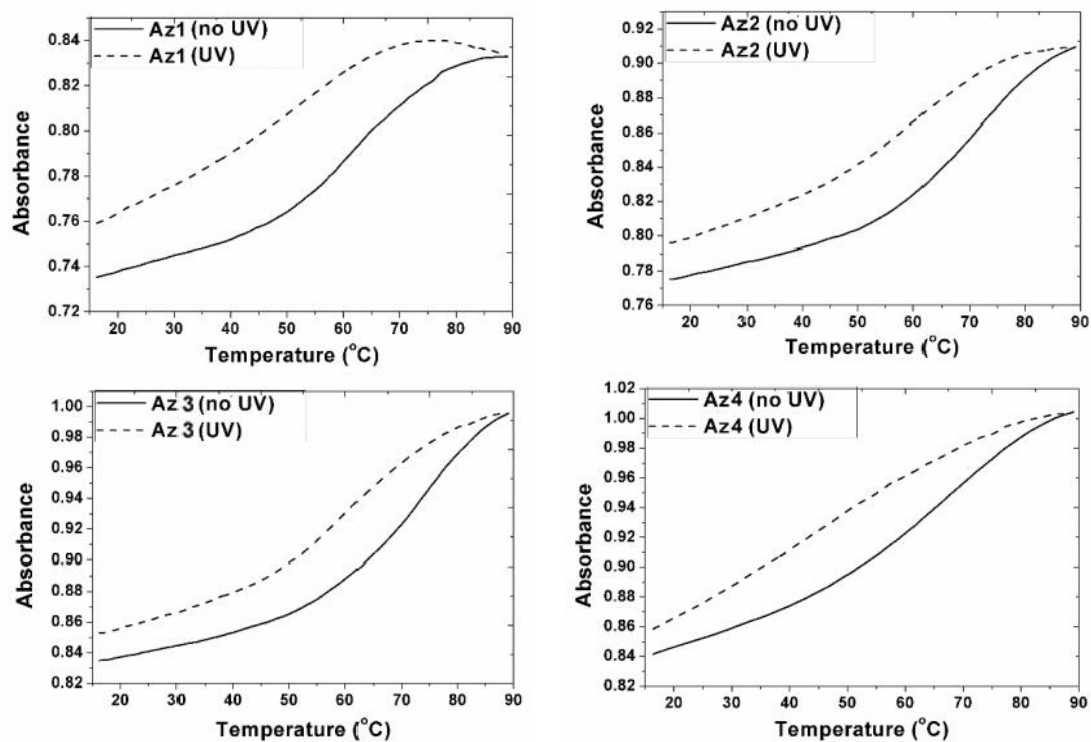

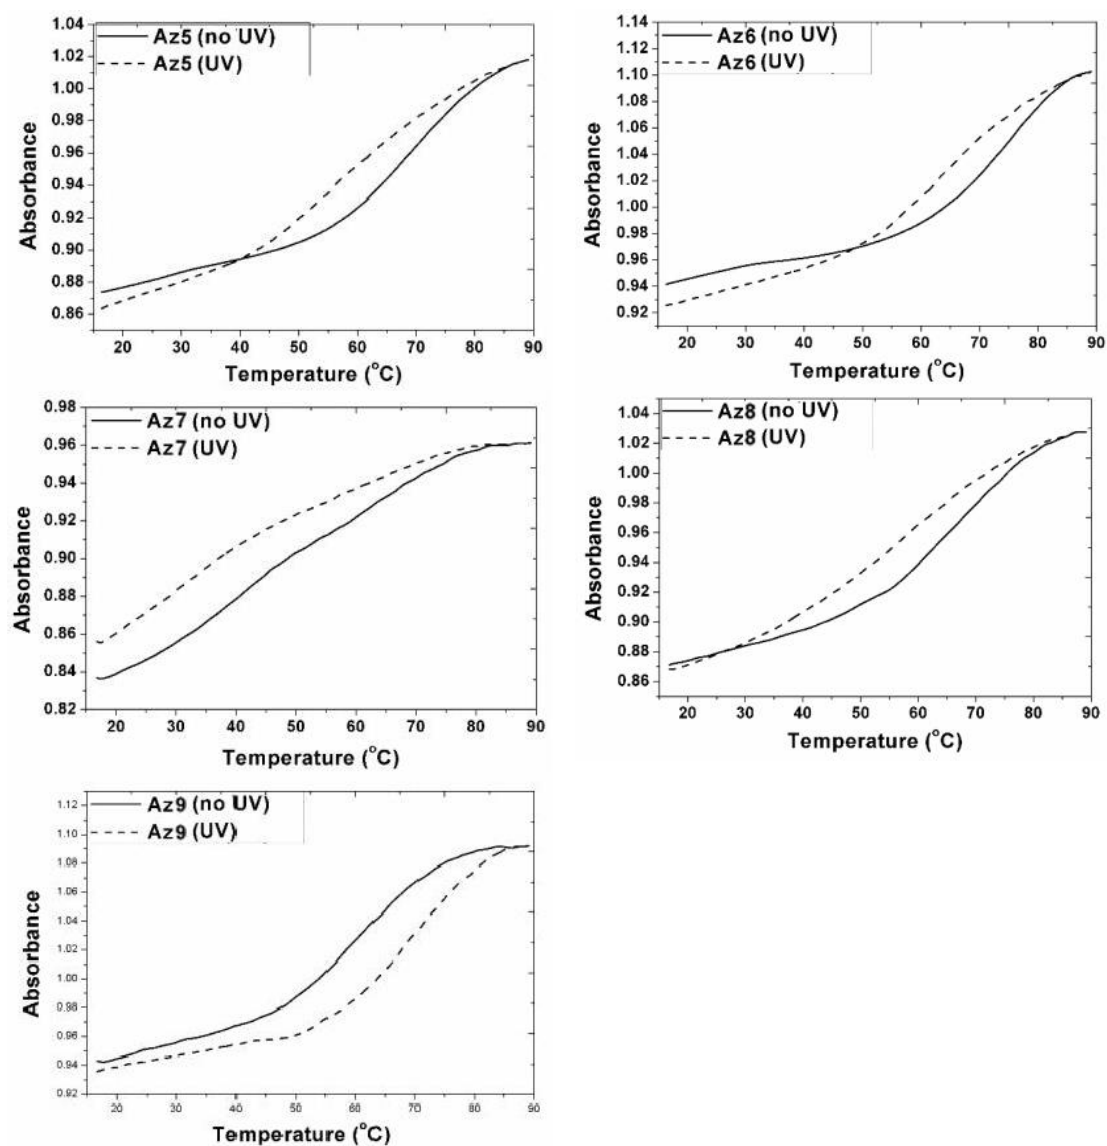

**Figure S5** Typical melting curves of all azobenzene linked dumbbell asODNs themselves, and the black and dashed lines present the melting curves before and after irradiation with UV light (365 nm), respectively. UV melting experiments were performed in 1× PBS and ODN concentrations were adjusted to 2  $\mu$ M.

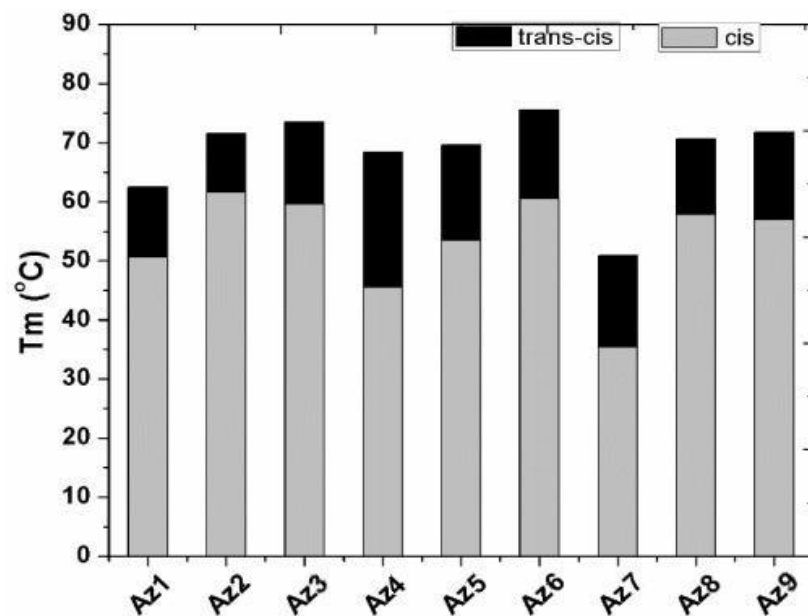

**Figure S6.**  $T_m$  comparison of azobenzene linked dumbbell asODNs before and after UV irradiation. Light gray represents  $T_m$  of cis-azobenzene linked ODNs, and black represents  $T_m$  of trans-azobenzene linked ODNs deducting that of the corresponding cis conformation.

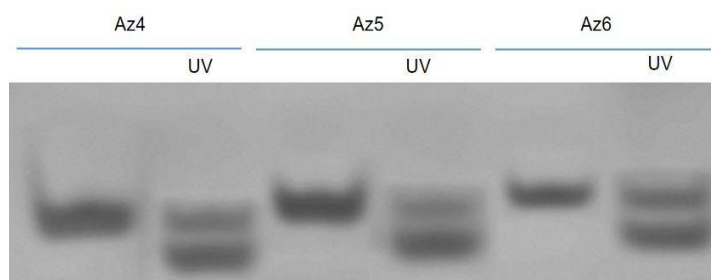

**Figure S7** Comparison of natural polyacrylamide gel electrophoresis strips with light azobenzene linked to dumbbell nucleic acid (365 nm). The samples from left to right were corresponding to trans-Az4, cis-Az4, trans-Az5 cis-Az5, trans-Az6, cis-Az6.

<sup>1</sup>H NMR Spectra of Compound 1

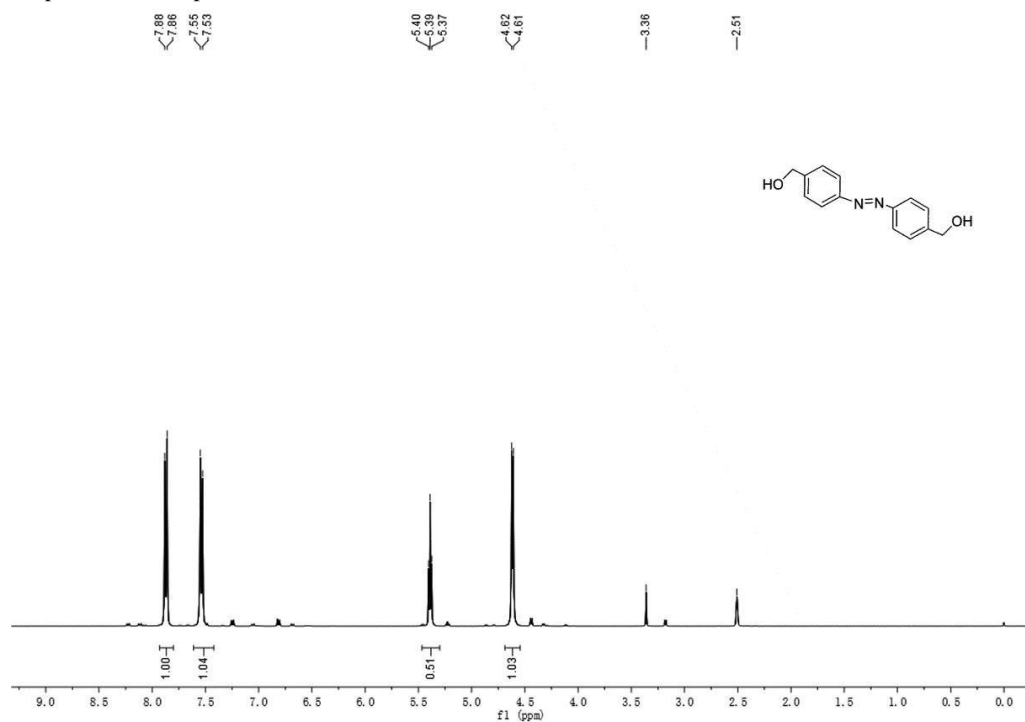

<sup>13</sup>C NMR Spectra of Compound 1

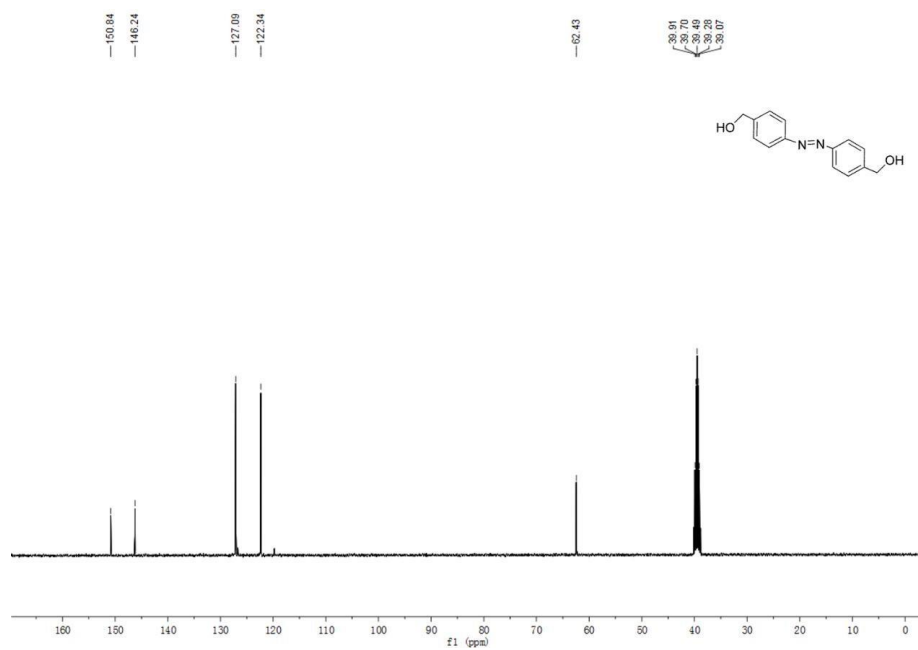

<sup>1</sup>H NMR Spectra of Compound 2



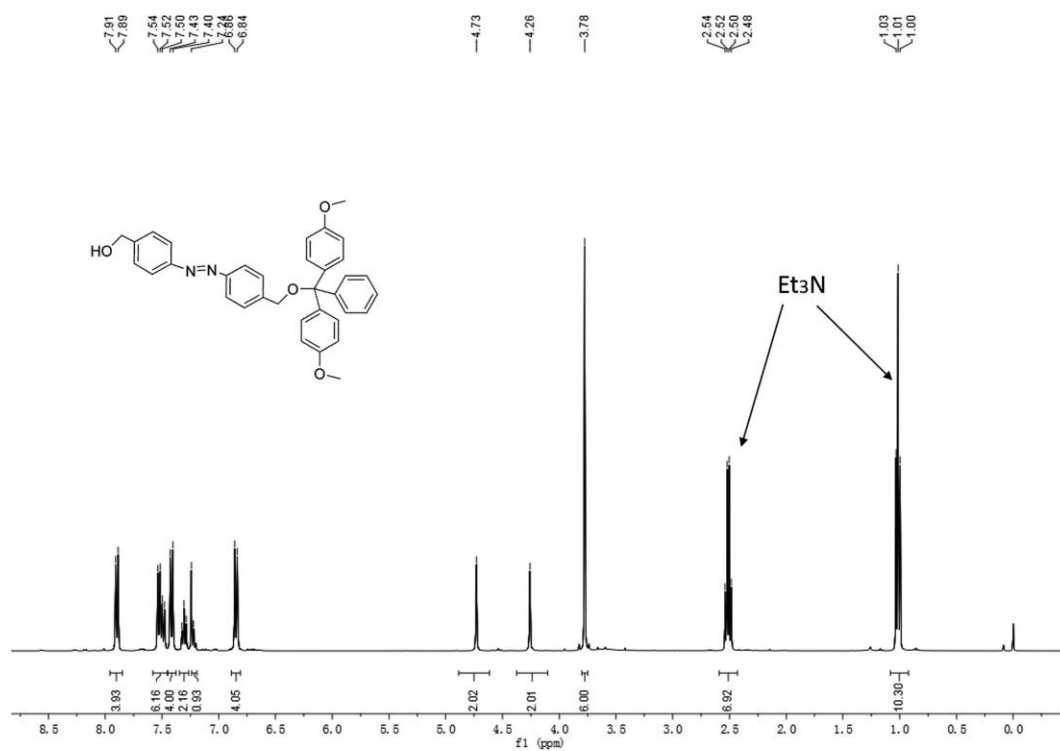

<sup>13</sup>C NMR Spectra of Compound 1

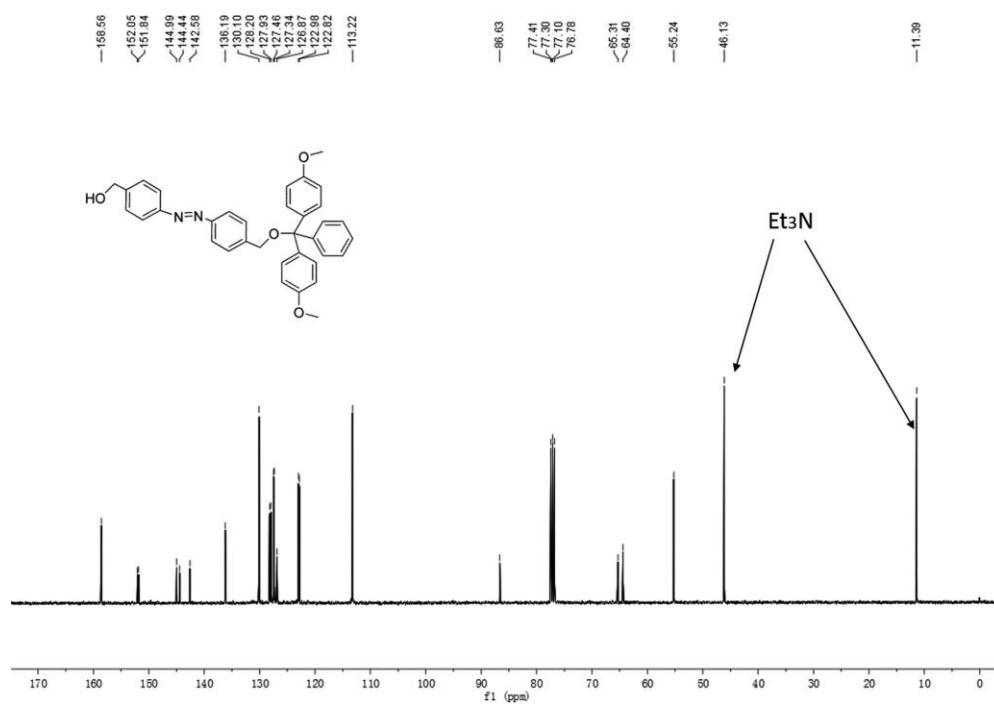

<sup>31</sup>P NMR Spectra of Compounds

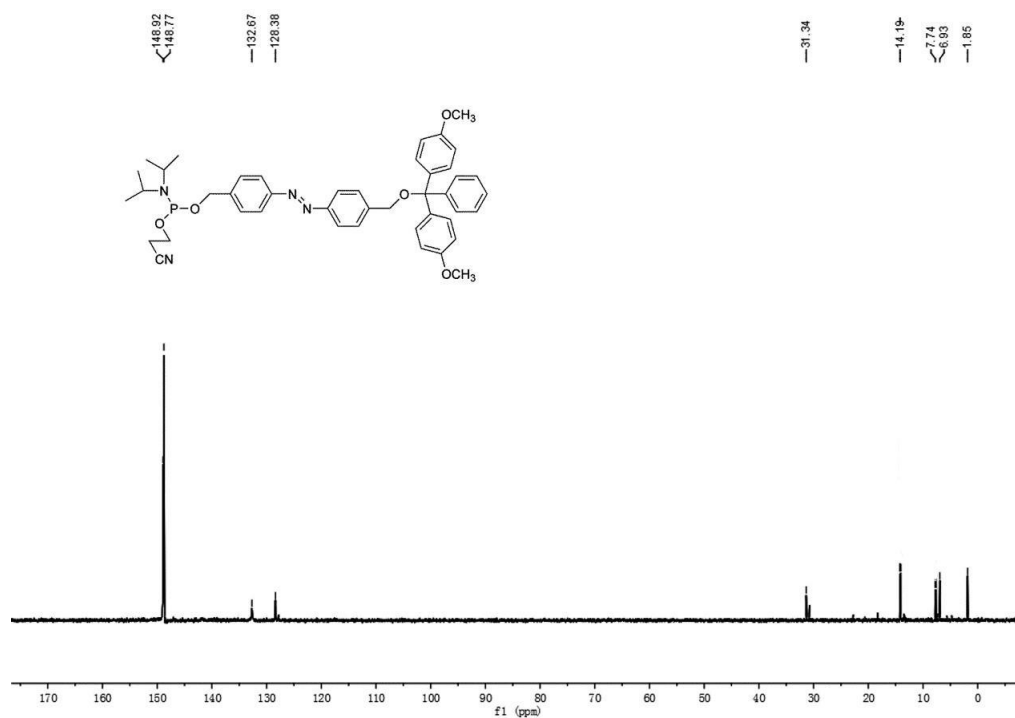

**Figure S8.**  $^1\text{H}$ ,  $^{13}\text{C}$ ,  $^{31}\text{P}$  NMR Spectra of Compounds.

**Table S1.** Values for ESI-MS of azobenzene linked dumbbell asODNs.

| Name       | Sequence                                                       | Calculated | Found   |
|------------|----------------------------------------------------------------|------------|---------|
| <b>Az1</b> | 5'-CGTT <b>azo</b> AACGTTTCGGACCGTA <b>azo</b> TACG-3'         | 7952.31    | 7954.2  |
| <b>Az2</b> | 5'-ACGTT <b>azo</b> AACGTTTCGGACCGTA <b>azo</b> TACGG-3'       | 8594.73    | 8596.5  |
| <b>Az3</b> | 5'-AACGTT <b>azo</b> AACGTTTCGGACCGTA <b>azo</b> TACGGT-3'     | 9212.14    | 9213.0  |
| <b>Az4</b> | 5'-GTTG <b>azo</b> CAACGTTTCGGACCGTAT <b>azo</b> ATAC-3'       | 8569.72    | 8571.4  |
| <b>Az5</b> | 5'-CGTTG <b>azo</b> CAACGTTTCGGACCGTAT <b>azo</b> ATACG-3'     | 9188.11    | 9190.1  |
| <b>Az6</b> | 5'-ACGTTG <b>azo</b> CAACGTTTCGGACCGTAT <b>azo</b> ATACGG-3'   | 9830.53    | 9832.1  |
| <b>Az7</b> | 5'-TTGG <b>azo</b> CCAACGTTTCGGACCGTATT <b>azo</b> AATA-3'     | 9187.13    | 9188.2  |
| <b>Az8</b> | 5'-GTTGG <b>azo</b> CCAACGTTTCGGACCGTATT <b>azo</b> AATAC-3'   | 9805.52    | 9807.1  |
| <b>Az9</b> | 5'-CGTTGG <b>azo</b> CCAACGTTTCGGACCGTATT <b>azo</b> AATACG-3' | 10423.91   | 10426.1 |

**Figure S9** ESI-MS spectra of azobenzene linked dumbbell asODNs.

**Az1**

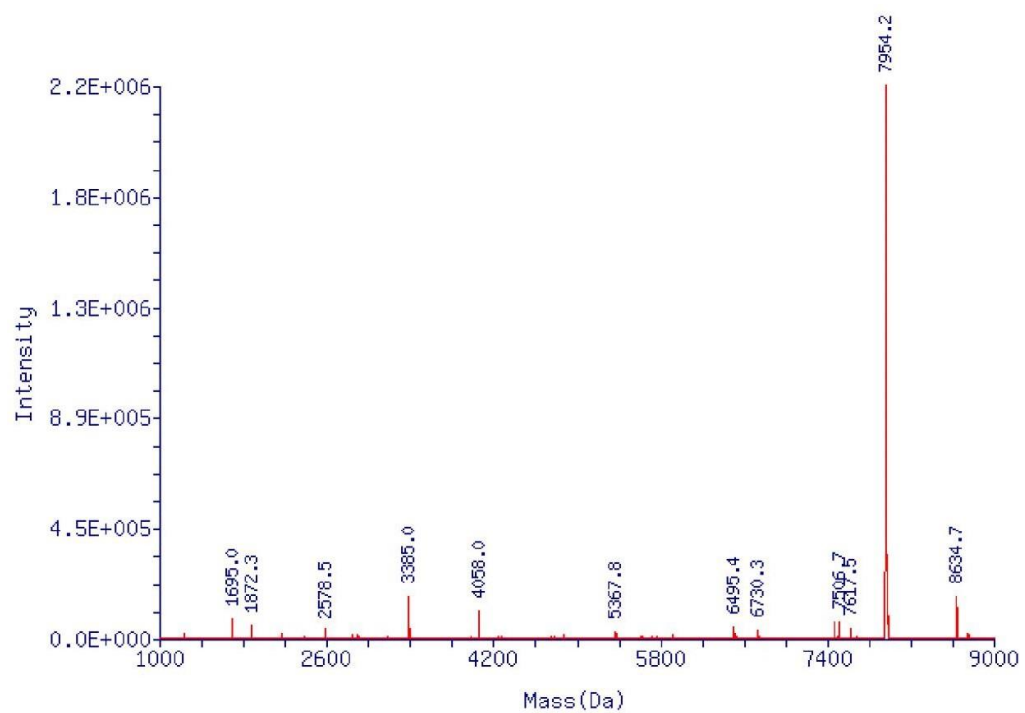

Az2

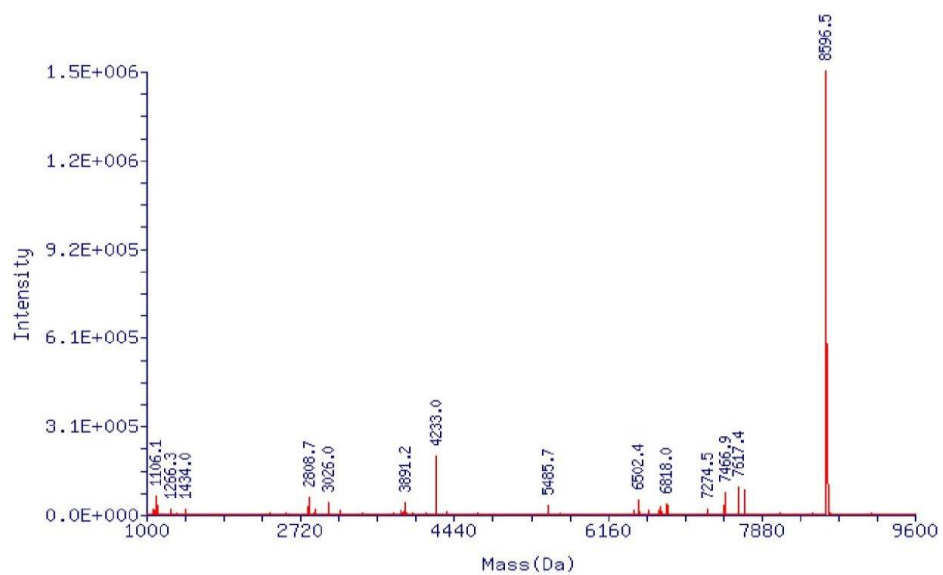

Az3

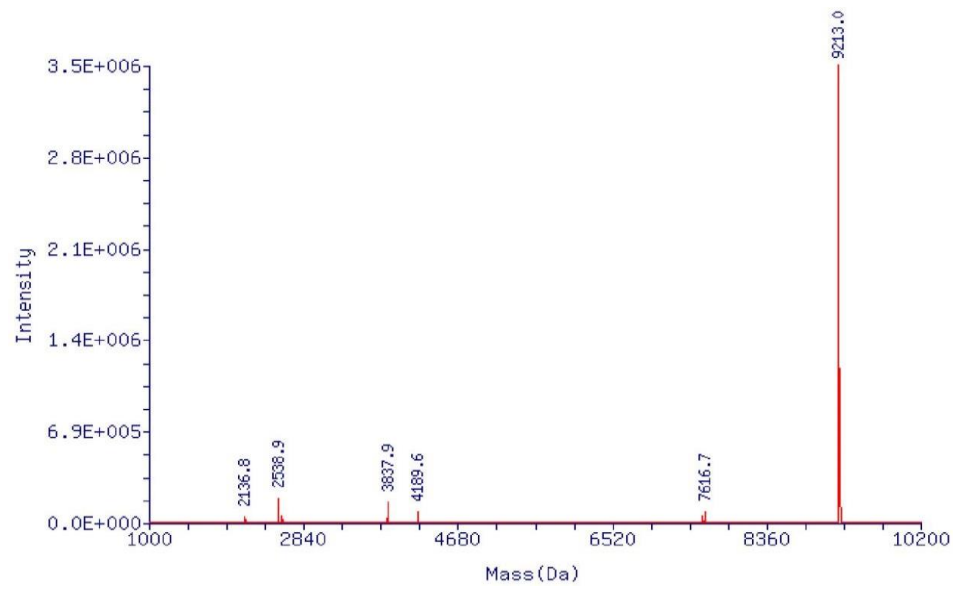

**Az4**

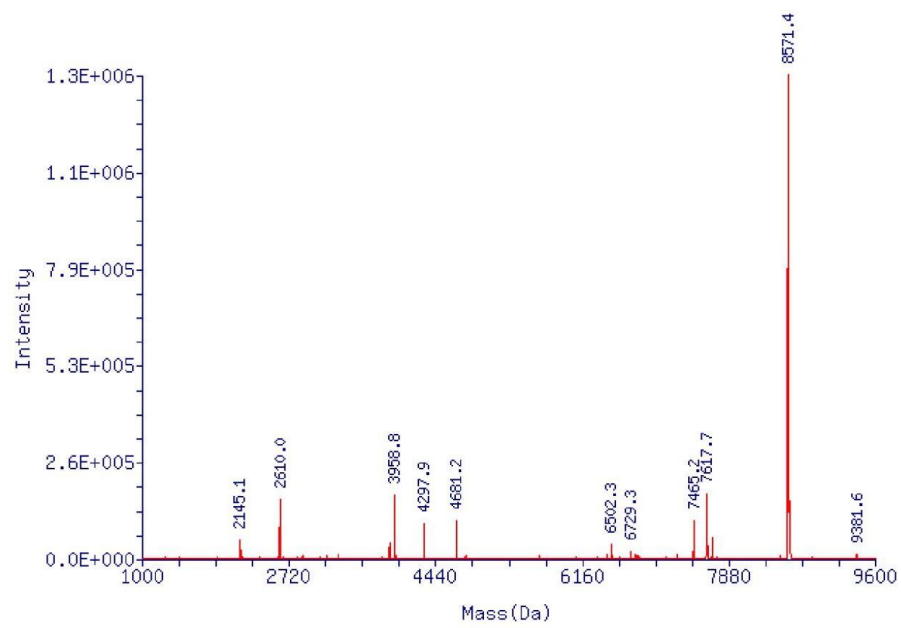

**Az5**

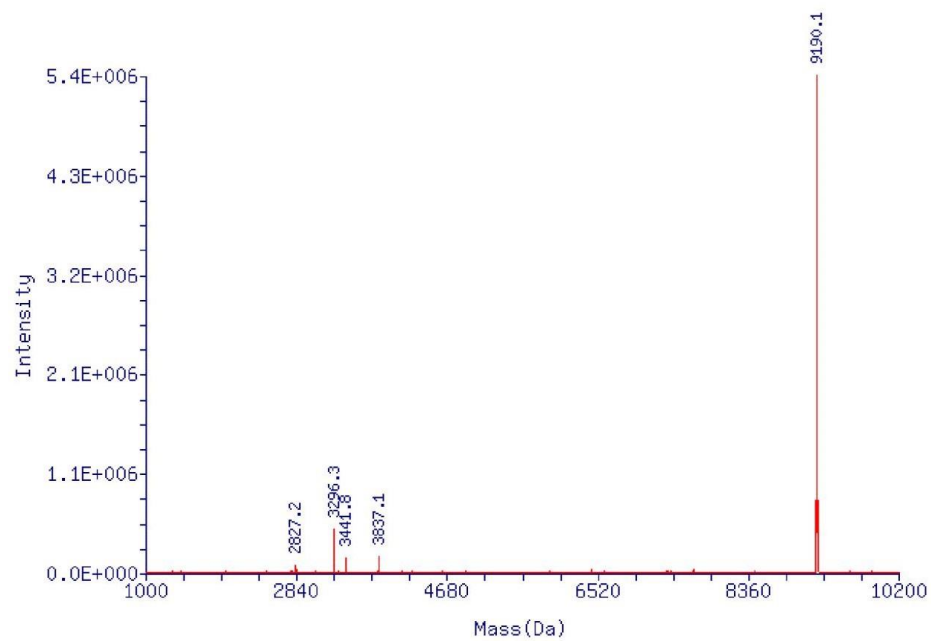

**Az6**

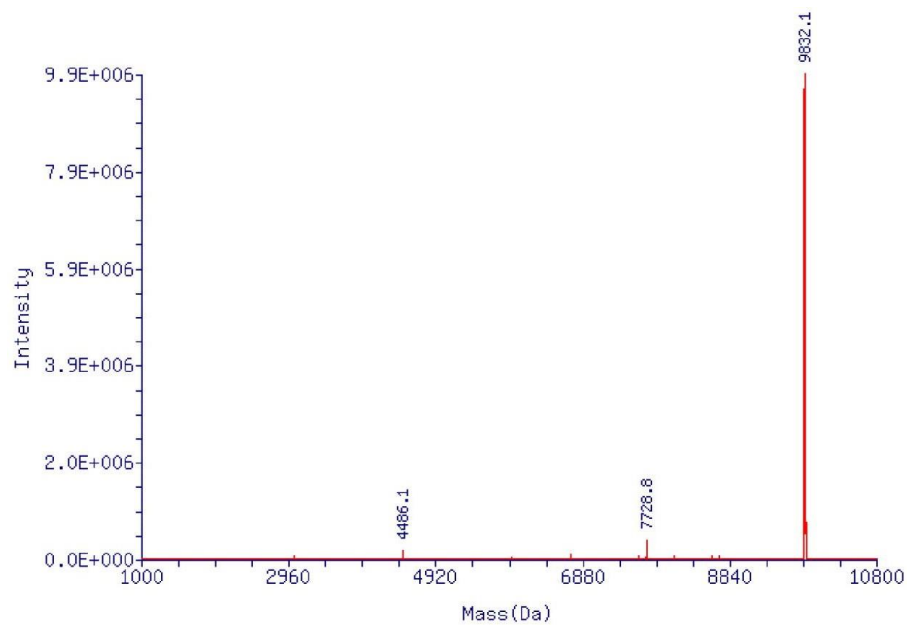

**Az7**

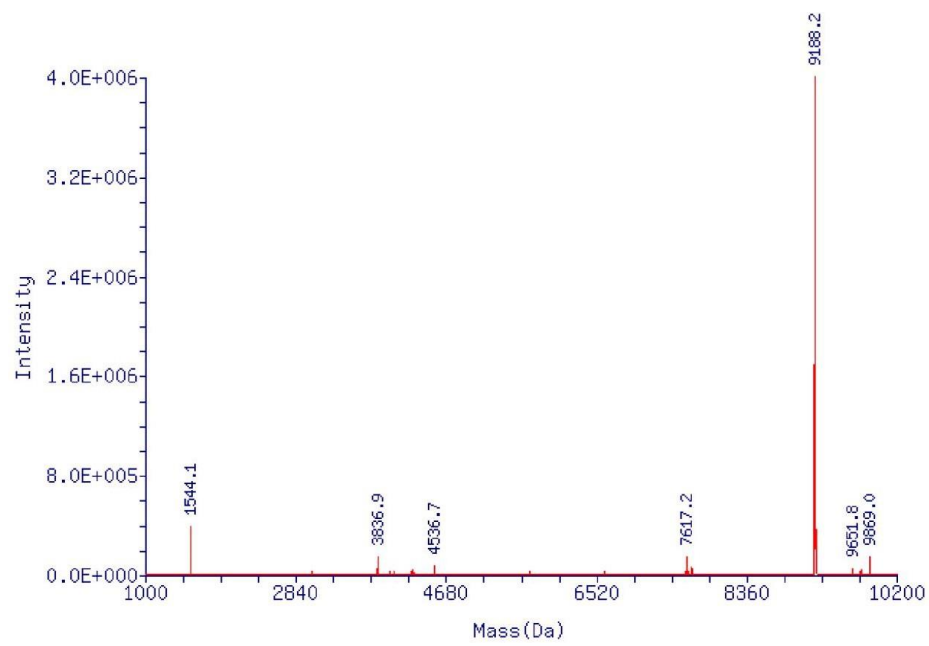

**Az8**

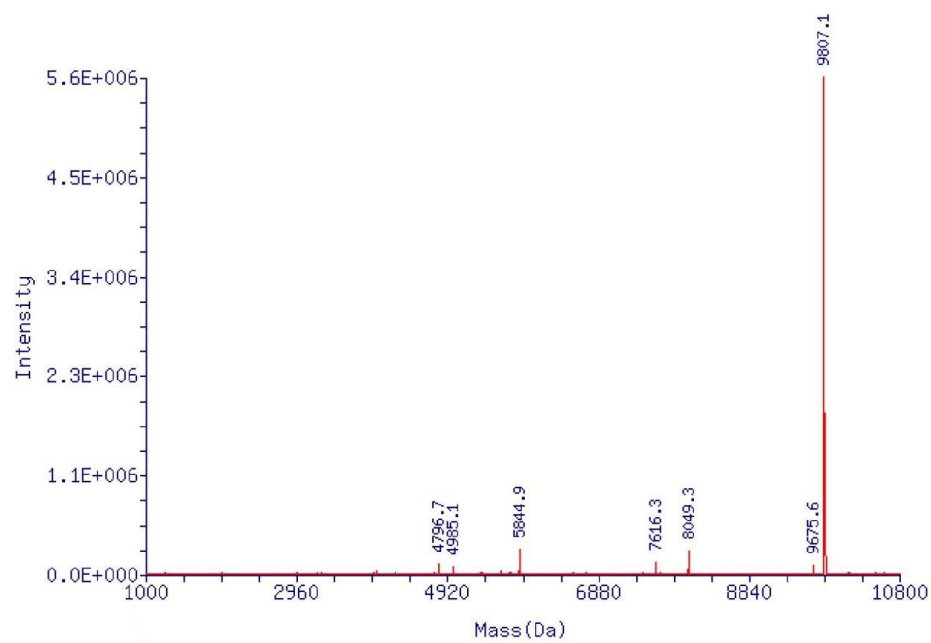

**Az9**

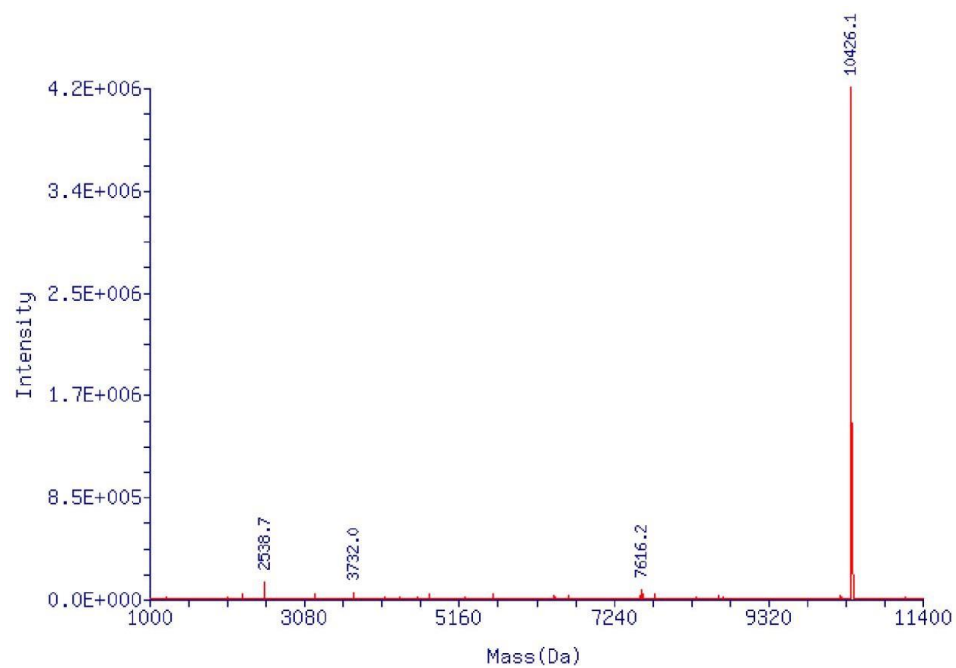

Supplement: s1 [file s1]
